# Supplementary material
Source: PubMed Central journal article supplement (PMC2750034)

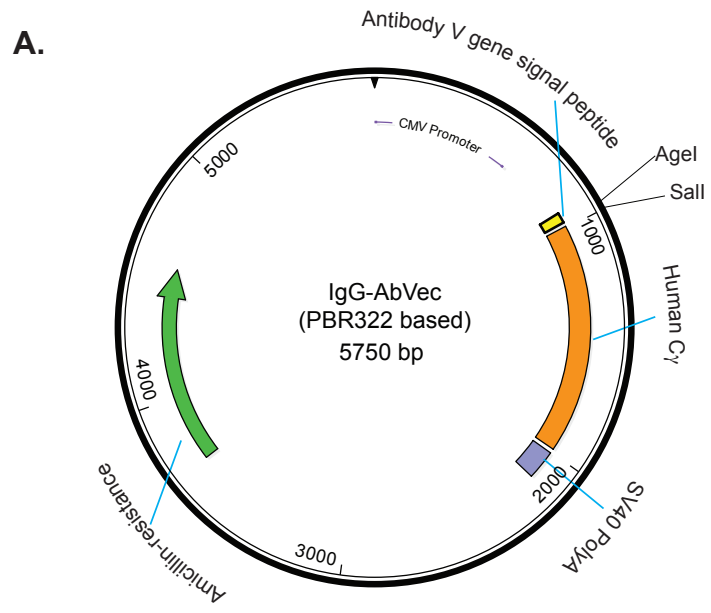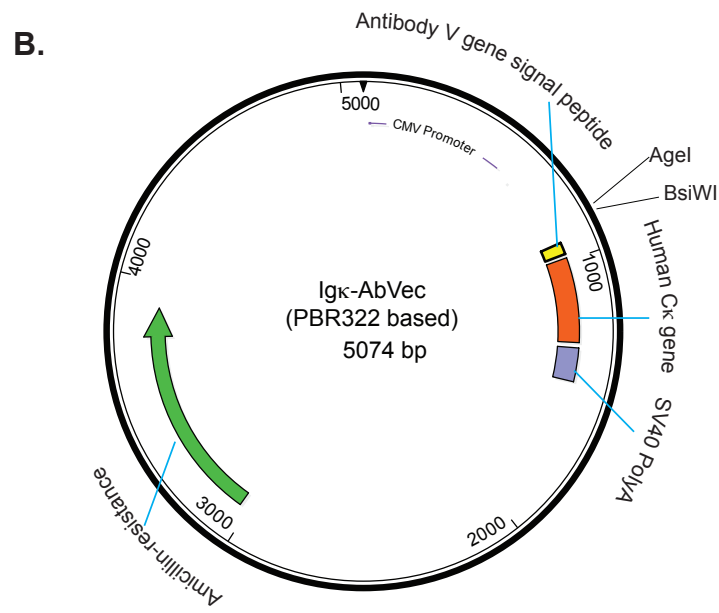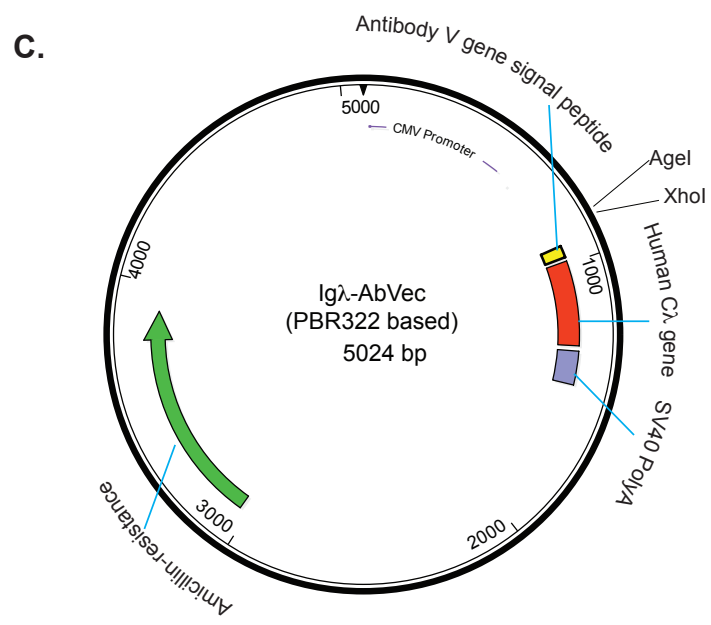

Supplement: NIHMS145735-supplement-Supplemental_Data.pdf [file NIHMS145735-supplement-Supplemental_Data.pdf]
